# Supplementary material
Source: PubMed Central journal article supplement (PMC4316729)
Supplement: NIHMS658350-supplement-Supplemental_Info_1.pdf [file NIHMS658350-supplement-Supplemental_Info_1.pdf]

|            | <b>MY1</b>           | <b>V2</b>            | <b>C3</b>            | <b>C4</b>            | <b>MY5</b>           | <b>VL6</b>           | <b>B7</b>           | <b>MA9</b>          |
|------------|----------------------|----------------------|----------------------|----------------------|----------------------|----------------------|---------------------|---------------------|
| <b>MY1</b> |                      | 0.09<br>(-0.85-1.04) | 1.42<br>(0.37-2.48)  | 0.21<br>(-0.63-1.06) | 0.62<br>(-0.28-1.51) | 0.01<br>(-0.77-0.79) | 1.36<br>(0.14-2.59) | 3.69<br>(2.26-5.11) |
| <b>V2</b>  | 0.33<br>(-0.62-1.28) |                      | 0.95<br>(0.12-1.78)  | 0.13<br>(-0.54-0.8)  | 0.54<br>(-0.18-1.27) | 0.04<br>(-0.55-0.64) | 1.61<br>(0.52-2.69) | 3.28<br>(2.14-4.41) |
| <b>C3</b>  | 0.53<br>(-0.43-1.48) | 0.63<br>(-0.18-1.43) |                      | 0.38<br>(-0.29-1.06) | 0.15<br>(-0.56-0.86) | 0.79<br>(0.18-1.40)  | 2.03<br>(0.87-3.19) | 4.03<br>(2.74-5.33) |
| <b>C4</b>  | 0.58<br>(-0.28-1.44) | 0.75<br>(0.05-1.44)  | 0.07<br>(-0.6-0.74)  |                      | 0.41<br>(-0.18-1.00) | 0.16<br>(-0.28-0.61) | 1.5<br>(0.57-2.42)  | 2.99<br>(2.1-3.88)  |
| <b>MY5</b> | 0.07<br>(-0.8-0.95)  | 0.12<br>(-0.59-0.83) | 0.36<br>(-0.35-1.08) | 0.48<br>(-0.11-1.07) |                      | 0.56<br>(0.05-1.06)  | 1.74<br>(0.74-2.75) | 3.45<br>(2.41-4.5)  |
| <b>VL6</b> | 0.4<br>(-0.39-1.18)  | 0.07<br>(-0.53-0.66) | 0.59<br>(-0.02-1.19) | 0.73<br>(0.27-1.19)  | 0.25<br>(-0.25-0.75) |                      | 1.27<br>(0.46-2.08) | 2.5<br>(1.85-3.15)  |
| <b>B7</b>  | 1.68<br>(0.39-2.97)  | 1.48<br>(0.41-2.54)  | 2.04<br>(0.88-3.2)   | 2.22<br>(1.22-3.23)  | 1.85<br>(0.83-2.86)  | 1.46<br>(0.65-2.28)  |                     | 0.84<br>(-0.1-1.77) |
| <b>MA9</b> | 5.63<br>(3.72-7.54)  | 4.87<br>(3.39-6.35)  | 5.14<br>(3.6-6.69)   | 4.88<br>(3.66-6.09)  | 4.27<br>(3.07-5.47)  | 3.97<br>(3.17-4.77)  | 2.07<br>(0.98-3.17) |                     |
