# Supplementary material
Source: PubMed Central journal article supplement (PMC4316729)
Supplement: NIHMS658350-supplement-Supplemental_Info_2.pdf [file NIHMS658350-supplement-Supplemental_Info_2.pdf]

Supplementary Table S1. Relative rate test results for samples with the reference versus non-reference allele at 31 SNPs located in DNA repair-related genes, identified as highly differentiated in drug-resistant *P. falciparum* populations (Miotto et al., 2013).  $\chi^2$  values calculated based on comparison of synonymous sites, with p-values based on 6,000 random permutations of SNP group assignment (reference vs non-reference). NR, non-reference; R, reference; ES, effect size.

| Ch | Pos.    | Description                           | Num. samples |    |         | Synonymous SNPs |         |      |       |        | All SNPs       |       |         |       |       |      |
|----|---------|---------------------------------------|--------------|----|---------|-----------------|---------|------|-------|--------|----------------|-------|---------|-------|-------|------|
|    |         |                                       | R            | NR | mNR-mR  | X <sup>2</sup>  | p-val   | ES   | 95%CI | mNR-mR | X <sup>2</sup> | p-val | ES      | 95%CI |       |      |
| 2  | 242618  | DNA repair endonuclease putative      | 80           | 97 | -6.433  | 0.091           | 0.0273  | 0.15 | -0.14 | 0.45   | -15.815        | 0.14  | 0.02567 | 0.09  | -0.21 | 0.39 |
| 5  | 401707  | Hypothetical protein conserved        | 136          | 7  | 2.912   | 0.018           | 0.7052  | 0.06 | -0.71 | 0.82   | 6.877          | 0.025 | 0.735   | 0.03  | -0.73 | 0.8  |
| 5  | 577697  | Deoxyribodipyrimidine photolyase      | 171          | 5  | 6.668   | 0.102           | 0.4426  | 0.19 | -0.71 | 1.08   | -2.675         | 0.004 | 0.9095  | 0.02  | -0.87 | 0.91 |
| 5  | 592528  | UvrD family helicase                  | 166          | 11 | -10.58  | 0.269           | 0.0621  | 0.27 | -0.34 | 0.89   | -27.698        | 0.47  | 0.044   | 0.17  | -0.44 | 0.78 |
| 6  | 238493  | RAD50 putative                        | 148          | 28 | -8.312  | 0.161           | 0.0308  | 0.24 | -0.17 | 0.64   | -30.127        | 0.54  | 0.0015  | 0.2   | -0.21 | 0.6  |
| 7  | 460125  | Hypothetical protein conserved        | 120          | 55 | -3.706  | 0.031           | 0.2303  | 0.1  | -0.22 | 0.42   | -14.073        | 0.113 | 0.07117 | 0.09  | -0.23 | 0.41 |
| 7  | 461139  | Hypothetical protein conserved        | 80           | 96 | 3.417   | 0.026           | 0.2399  | 0.08 | -0.21 | 0.38   | 2.225          | 0.003 | 0.752   | 0.01  | -0.28 | 0.31 |
| 7  | 461364  | Hypothetical protein conserved        | 100          | 77 | -6.23   | 0.087           | 0.033   | 0.16 | -0.14 | 0.46   | -14.854        | 0.126 | 0.0385  | 0.09  | -0.21 | 0.39 |
| 7  | 1059929 | Exonuclease I putative                | 158          | 19 | -10.633 | 0.266           | 0.0173  | 0.29 | -0.18 | 0.77   | -26.179        | 0.409 | 0.0195  | 0.17  | -0.31 | 0.65 |
| 7  | 1105672 | Mismatch repair protein pms1 homolog  | 161          | 16 | -15.899 | 0.602           | 7.0E-04 | 0.44 | -0.07 | 0.96   | -23.261        | 0.324 | 0.04883 | 0.15  | -0.37 | 0.66 |
| 9  | 1346394 | DNA excision repair helicase putative | 166          | 11 | -9.708  | 0.219           | 0.0985  | 0.3  | -0.31 | 0.91   | -19.846        | 0.232 | 0.1665  | 0.15  | -0.47 | 0.76 |
| 10 | 169428  | Hypothetical protein                  | 156          | 21 | 0.884   | 0.002           | 0.8341  | 0.02 | -0.43 | 0.48   | -13.633        | 0.108 | 0.20717 | 0.08  | -0.37 | 0.54 |
| 10 | 256602  | Hypothetical protein                  | 168          | 8  | -4.69   | 0.05            | 0.4895  | 0.14 | -0.57 | 0.85   | -37.821        | 0.842 | 0.02033 | 0.27  | -0.44 | 0.98 |
